# Supplementary material
Source: publisher figshare collection journal article supplement (https://wiley.figshare.com/articles/dataset/_/3520970)
Supplement: Supplementary file 1 [file 1]

## Appendix A. Multiple Element Limitation (MEL) model as applied to arctic tundra.

The full Multiple Element Limitation (MEL) model used in the paper is described in the electronic appendix to Rastetter et al. (2013). Here we describe only the modifications we made to the model for application to arctic tundra (MELIVarc). Parameters and variables and their values are defined in Table A1. All citations to equations in the text are equations in the electronic appendix to Rastetter et al. (2013).

### Allometry (replaces Eq. A35)

To calculate the allometry of active biomass as a function of total biomass, we now use a simple linear relation with a correction to insure that active biomass never exceeds total biomass (Fig. A1):

$$B_A = \min(B_{T^*}, \alpha_B + \gamma_B B_{T^*})$$

### Organic soil depth index

We calculate an organic soil depth index that is proportion to the amount of phase I plus phase II soil organic carbon. This index is used in the soil water and soil temperature models:

$$z_p = a_p (D_{C1} + D_{C2})$$

### Soil heat budget and soil temperature

We calculate the soil heat budget based on heat exchange with the underlying permafrost and the overlying air, and on the radiative heating. The soil heat budget is calculated on discrete daily time steps:

$$S_Q(t) = S_Q(t-1) + k_{pf} \frac{T_{pf} - T_{so}}{z(z_{pf} + z_T)} + \frac{T_a - T_{so}}{z z_s (1/k_s + 0.01 W_{snow}/k_{snow})} + \frac{b_I(1-\alpha)I}{z}; \text{ if } W_{snow} > 0$$

$$= S_Q(t-1) + k_{pf} \frac{T_{pf} - T_{so}}{z(z_{pf} + z_T)} + k_s \frac{T_a - T_{so}}{z z_s} + \frac{b_I I e^{-k_1 L}}{z}; \text{ if } W_{snow} = 0$$

$$k_{sT} = \frac{W}{1000z} k_w + (1 - \rho_s) \min\left(\frac{z_p}{z}, 1\right) k_{so} + (1 - \rho_s) \max\left(1 - \frac{z_p}{z}, 0\right) k_{sm}$$

$$k_{sF} = 1.06 k_{sT} + 0.0121$$

$$k_s = k_{sT}; \text{ if } T_{so} > 0$$

$$= k_{sF}; \text{ otherwise}$$

where  $k_{sT}$ ,  $k_{sF}$ , and  $k_s$  are the thawed, frozen and actual soil thermal conductivity. We now use soil temperature for all temperature-sensitive processes below ground. We calculate soil temperature based on the soil heat content and the heat capacity of thawed and frozen soil:

$$\begin{aligned}
T_{so} &= \frac{S_Q - S_{QT}}{c_{sT}}; \text{ if } S_Q > S_{QT} \\
&= \frac{S_Q - S_{QF}}{c_{sF}}; \text{ if } S_Q < S_{QF} \\
&= 0 \quad ; \text{ otherwise}
\end{aligned}$$

$$c_{sT} = \frac{W}{1000z} c_w + (1 - \rho_s) \min\left(\frac{z_p}{z}, 1\right) c_{so} + (1 - \rho_s) \max\left(1 - \frac{z_p}{z}, 0\right) c_{sm}$$

$$c_{sF} = 0.88 c_{sT} - 0.139$$

where  $c_{sT}$  and  $c_{sF}$  are the thawed and frozen soil heat capacities. Soil temperature ( $T_{so}$ ) replaces air temperature ( $T_a$ ) in all the following processes and equations in Rastetter et al. (2013): (1) root portion of plant respiration in Eq. A61, (2) uptake for  $\text{NH}_4^+$ ,  $\text{NO}_3^-$ , and  $\text{PO}_4^{3-}$  in Eqs. A66-A68, (3) the temperature/moisture response of general microbial metabolism in Eq. A96, and (4) denitrification in Eq. A124.  $T_{so}$  is also used to calculate non-symbiotic N fixation, which is described below.

### Recalcitrant dissolved organic matter

We now simulate both labile and recalcitrant forms of dissolved organic matter and associated N (DOM and DON). The equations for recalcitrant DOM and DON production and for recalcitrant DOM leaching are identical to those for labile DOM in Rastetter et al. (2013; respectively, Eqs. A115, A116, and A132), but with different parameters. The differential equation for recalcitrant DOM is the same as that for labile DOM (Eq. A5), but without uptake by either plants or microbes.

### Hydrologically active soil fraction

We restrict hydrologic runoff and plant water uptake to the fraction of the active soil layer that was thawed. In addition, because the hydraulic conductivity of the underlying silt mineral soil is low, we scale runoff and water uptake to the organic soil depth index ( $z_p$ ). The scaling factor is calculated as the minimum of the thawed or organic depth fractions or one:

$$f_A = \min\left(1, \frac{z_T}{z}, \frac{z_p}{z}\right)$$

### Hydrologic runoff (modified from Eq. A128)

We scale the runoff equation by the  $f_A$  to limit runoff to only that volume of the soil that is thawed:

$$R_O = D_W f_A (W - 1000z\theta_f) + \max(0, I_{rain} - f_A(1000\rho_s z - W)) + \max(0, T_{SM} - f_A(1000\rho_s z - W))$$

In addition, we limited infiltration from rainfall (A134) and snow melt (A137) to the pore volume within the thawed soil; we add any excess to the runoff.

**Snowmelt critical temperature** (modification of Eq. A137)

We now use separate critical temperatures for determining when precipitation is as snow ( $T_{crt}$ ) and the critical temperature of melting the snow pack ( $T_{crt_s}$ ).

**Water uptake by plants** (modified from Eq. A52)

We scale water uptake by the  $f_A$  to limit water extraction by roots to the thawed soil:

$$U_{W_s} = g_W f_A U_{W_p} \left( 1 - e^{-k_E R_L \frac{(V_W - V_{min})}{V_R}} \right) (\psi_s - \psi_w)$$

**Canopy light photosynthesis** (modified from Eq. A48)

We modified the photosynthesis-light equation to be more responsive to changes in allocated effort at low light levels:

$$U_{C_l} = 1.6 D_L f_{PT} \left( \frac{C_a - 60}{C_a + 120} \right) \frac{P_{lmax}}{k_l} \ln \left( \frac{k_{PI} + I/D_L}{k_{PI} + I e^{-k_i L}/D_L} \right)$$

**Water uptake and transpiration** (modified from Eqs. A51 and A58)

To facilitate automated calibration, we added a constant ( $S_{cET}$ ) to scale from hourly to daily water uptake and transpiration:

$$U_{W_p} = 7.775 S_{cET} D_L c_{cmax} \Delta_e \quad \text{and} \quad U_W = 7.775 S_{cET} D_L c_c \Delta_e$$

Note: the 7.775 is a combination of the air density, air specific heat, latent heat of vaporization for water, and psychrometer constant.

**Carboxylation-diffusion** (modified from Eqs. A54 and A57)

To facilitate automated calibration, we added a constant ( $S_{Ucc}$ ) to scale from hourly to daily carboxylation and diffusion:

$$P_{sC} = D_L \frac{P_{Cmax} C_{i^*}}{k_C + C_{i^*}} = 0.000335 S_{Ucc} D_L c_{cs} (C_a - C_{i^*}) \quad \text{and} \quad c_c = \frac{U_C}{0.000335 S_{Ucc} D_L (C_a - C_i)}$$

Note: the 0.000335 is a combination of the ratio of diffusivity of water to CO<sub>2</sub>, the molar weight of C, and the moles m<sup>-3</sup> for an ideal gas.

**CO<sub>2</sub>- and H<sub>2</sub>O-limited photosynthesis** (modified from Eqs. A59 and A60)

To facilitate calibration, we changed the weighting on the differential term in the CO<sub>2</sub>-limited and H<sub>2</sub>O-limited photosynthesis to a parameter ( $\beta$ ):

$$U_{CC} = P_{sC} + \beta \left( \frac{dP_{sC}}{dV_W} - \frac{dP_{sC}}{dV_C} \right) \text{ and } U_{CW} = P_{sC} - \beta \left( \frac{dP_{sC}}{dV_W} - \frac{dP_{sC}}{dV_C} \right)$$

### Plant uptake of dissolved organic N

We allow plants to take up labile DON. The uptake equation is analogous to the other nutrient uptake equations in the model (Eqs. A66-A68). The two uptake equations for labile DOM uptake have to be solved simultaneously to calculate uptake and the concentration of DOM at the root surface ( $C_{aqDOMs}$ ) and the DON uptake is then calculated based on the C:N ratio of labile DOM:

$$\begin{aligned} U_{DOM} &= g_{DOM} \left( \frac{V_{DON} - V_{min}}{V_R} \right) R_L Q_{10v}^{T_{so}/10} \left( \frac{C_{aqDOMs}}{k_{DOM} + C_{aqDOMs}} \right) \\ &= \frac{D_{DOM} R_L 12 \times 10^{-3}}{\beta_{NRD}} (C_{aqDOMs} - C_{aqDOM}) \end{aligned}$$

$$U_{DON} = U_{DOM} / q_{DOM}$$

The uptake rates of DOM and DON are added to differential equations for biomass C and N (Eqs. A1 and A6) and the uptake of DOM is subtracted from the differential equation for labile DOM (Eq. A5).

### Symbiotic N fixation

We calculate symbiotic N fixation as proportional to the effort allocated to support N fixation and the root length available to host the symbionts, and modified by a Q10 function of soil temperature:

$$U_{Nfix} = g_{Nfix} \left( \frac{V_{Nfix} - V_{min}}{V_R} \right) R_L Q_{10v}^{T_{so}/10}$$

The associated N gain is added to the plant biomass N in the differential equation for  $B_N$  (Eq. A6).

### Allocation of uptake effort among substitutable sources of N (modified from Eqs. A82 and A83 plus adds equations for DON and symbiotic N fixation)

For the Arctic we allow plant N requirements to be filled by four substitutable sources of N,  $NH_4^+$ ,  $NO_3^-$ , dissolved organic N (DON), and symbiotic N fixation. Incremental allocation of uptake effort is to the N source with the highest marginal yield. We calculate the marginal yield as the incremental increase in uptake per incremental increase in allocated effort, including the effort needed to supply the C cost of assimilating each of the N sources:

for  $k = NH_4, NO_3, DON, \text{ or } Nfix$

$$y_k = \frac{\frac{dU_k}{dV_k}}{1 + \frac{dU_k}{dV_k} \frac{\phi_k}{\Theta_C}}$$

We extended Eqs. A84 - A86, A94 and A95 to include all four N sources and added equations analogous to A91 and A92 for DON and symbiotic N fixation.

### Temperature responses of plant metabolic respiration (replaces Eq. 61)

We implemented three changes to the equation for metabolic respiration. First we calculated root metabolic respiration based on soil temperature. Second, we modified the  $Q_{10}$  formulation so that respiration increases more linearly for air temperatures between 15 and 20 °C (in our simulations, air temperatures rarely exceed 15 °C and never above 20 °C). Third, we modified the wood respiration term to account for difference between wood and rhizome respiration.

$$R_a = r_m (q_{LN} B_L + q_{WN} B_W e^{-k_{rw} B_W}) (m_{Q10V} + b_{Q10V} T_a)^{T_a/10} + r_m q_{RN} B_R (m_{Q10V} + b_{Q10V} T_a)^{T_{so}/10}$$

### Plant respiration associated with N uptake and assimilation (modified from Eq. A62)

We now assess a respiration cost to the uptake and assimilation of all four forms of N acquisition:

$$R_u = \phi_{NH4} U_{NH4} + \phi_{NO3} U_{NO3} + \phi_{DON} U_{DON} + \phi_{Nfix} U_{Nfix}$$

### Non-symbiotic N fixation

The rate of non-symbiotic N fixation in the model is proportional to the deviation of the phase I soil C:N ratio above the specified critical C:N ratio and is modified by the same temperature/moisture function as all microbial processes ( $R_m$ , Eq. A96):

$$U_{NNSfix} = R_m \gamma_{Sfix} \left( \frac{D_{C1}}{D_{N1}} - q_{Sfix} \right) D_{C1} ; \text{if } \frac{D_{C1}}{D_{N1}} > q_{Sfix}$$

$$= 0 ; \text{otherwise}$$

The fixed N is added to the differential equation for phase I soil organic matter (Eq. A8) and to the total microbial N acquisition (Eq. A106).

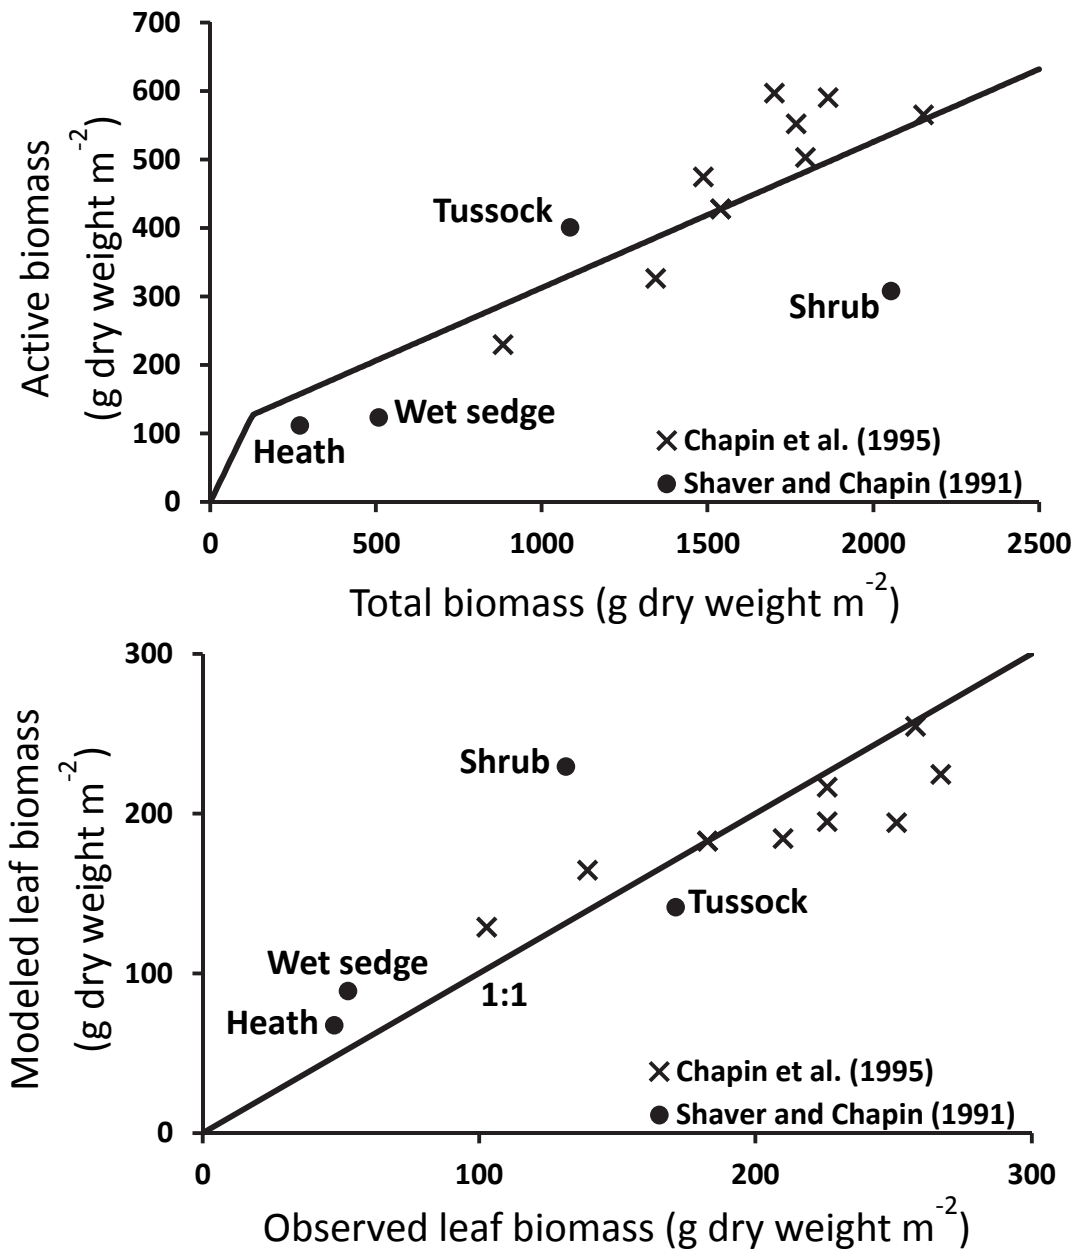

**Figure A1:** Allometric equation used to calculate active biomass (leaf + fine roots) from total biomass. Solid black line in the upper panel is the relationship used in the MEL model. x's are for tussock tundra after undergoing 3 and 9 years of experimental manipulations of nitrogen and phosphorus fertilization, enclosures in green houses, or enclosure in shade houses (see Fig. 3 in main text). Because only leaf and woody data were available, root mass was estimated based on the root:active ratio predicted by the MEL model. Dots are for the four major vegetation types on the North Slope of Alaska. Because the root biomass reported by Shaver and Chapin (1991) were thought to be over estimates (Shaver pers. Com.) we estimated root biomass assuming that the roots: active ratio of 0.57 used in the tussock-tundra calibration applied to all four vegetation types. Lower panel shows the modeled versus observed leaf biomass for the same data.

**Table A1:** State variables, drivers, processes and parameters for the Multiple Element Limitation (MEL) model. Variables are grouped into sections by type and then within each section values are arranged in the same categories used in Rastetter et al. (2013)

| State Variables       | Symbol    | Value   | Units               | Notes                                                                                |
|-----------------------|-----------|---------|---------------------|--------------------------------------------------------------------------------------|
| Jan 1 biomass C       | $B_C$     | 654     | g C m <sup>-2</sup> | $B_C(peak) - LCWC - LC$                                                              |
| Jan 1 biomass N       | $B_N$     | 15.2    | g N m <sup>-2</sup> | $B_N(peak) - LCWCN - LN$                                                             |
| Jan 1 biomass P       | $B_P$     | 1.52    | g P m <sup>-2</sup> | $B_P(peak) - LCWCP - LP$                                                             |
| Peak season biomass C | $B_C$     | 878     | g C m <sup>-2</sup> | Aboveground biomass (Mack et al. 2004 - Fig. 2a) + Fine roots (Sullivan et al. 2007) |
| Peak season biomass N | $B_N$     | 20.6    | g N m <sup>-2</sup> | $B_C * \%N$ (Shaver et al. 2006)                                                     |
| Peak season biomass P | $B_P$     | 2.06    | g P m <sup>-2</sup> | Shaver and Chapin, 1991 - Table 5                                                    |
| Soil organic C        | $D_{CI}$  | 5049    | g C m <sup>-2</sup> | Mack et al. 2004 - Supplementary Table 1                                             |
| Soil organic N        | $D_{NI}$  | 178     | g N m <sup>-2</sup> | Calibrated, initial value from Mack et al. 2004 - Supplementary Table 1              |
| Soil organic P        | $D_{PI}$  | 17.8    | g P m <sup>-2</sup> | $D_{NI}/N:P$ ratio for O horizon (Hobbie & Gough 2002 - Table 2)                     |
| Woody debris C        | $D_{Cc}$  | 517.9   | g C m <sup>-2</sup> | Dead rhizomes (Dennis 1997, Shaver et al. 2006) + standing dead (Gough et al. 2009)  |
| Woody debris N        | $D_{Nc}$  | 6.73    | g N m <sup>-2</sup> | $D_{Cc} * \%N$ (Shaver et al. 2006)                                                  |
| Woody debris P        | $D_{Pc}$  | 0.67    | g P m <sup>-2</sup> | $D_{Nc}/B_N : B_P$ (Shaver and Chapin 1991 - Table 5)                                |
| Phase II SOM C        | $D_{C2}$  | 13885   | g C m <sup>-2</sup> | Mack et al. 2004 - Supplementary Table 1, mineral soil extrapolated to depth of thaw |
| Phase II SOM N        | $D_{N2}$  | 646     | g N m <sup>-2</sup> |                                                                                      |
| Phase II SOM P        | $D_{P2}$  | 79.4    | g P m <sup>-2</sup> | $D_{N2} * P:N$ (Kirkby et al. 2011)                                                  |
| NH <sub>4</sub>       | $E_{NH4}$ | 0.26651 | g N m <sup>-2</sup> | Giblin et al. 1991 - Fig 5                                                           |

|                        |            |         |                           |                                                                                                                                                                                                                      |
|------------------------|------------|---------|---------------------------|----------------------------------------------------------------------------------------------------------------------------------------------------------------------------------------------------------------------|
| NO <sub>3</sub>        | $E_{NO3}$  | 0.00194 | g N m <sup>-2</sup>       | Giblin et al. 1991 - Fig 5                                                                                                                                                                                           |
| PO <sub>4</sub>        | $E_{PO4}$  | 0.00465 | g P m <sup>-2</sup>       | Giblin et al. 1991 - Fig 5                                                                                                                                                                                           |
| P Prim min             | $P_A$      | 25.11   | g P m <sup>-2</sup>       | Chapin et al. 1978 Non-exchangeable inorganic P (lower 10cm extrapolated to depth of thaw); 64% as PA, 36% as P2nd (Yanai 1992)                                                                                      |
| P non-Occluded         | $P_{2nd}$  | 14.12   | g P m <sup>-2</sup>       |                                                                                                                                                                                                                      |
| g labile DOM C         | $E_{DOM}$  | 2.3     | g C m <sup>-2</sup>       | Total $E_{DOM}$ = mobile (Whittinghill 2010) + sorbed (Oosterwoud 2010), split 10% labile 90% recalcitrant (Whittinghill 2010; McDowell 2006)                                                                        |
| g recalcitrant DOM C   | $E_{DOMR}$ | 20.7    | g C m <sup>-2</sup>       |                                                                                                                                                                                                                      |
| CO <sub>2</sub> effort | $V_c$      | 0.383   | effort g DW <sup>-1</sup> | Total root effort calculated from leaf:root ratio. Effort to water uptake assumed to be 0.1. Effort assumed equal between N and P. Effort to NH <sub>4</sub> versus DON allowed to adjust to calibration conditions. |
| NH <sub>4</sub> Effort | $V_{NH4}$  | 0.134   | effort g DW <sup>-1</sup> |                                                                                                                                                                                                                      |
| PO <sub>4</sub> effort | $V_{PO4}$  | 0.239   | effort g DW <sup>-1</sup> |                                                                                                                                                                                                                      |
| Light effort           | $V_I$      | 0.0367  | effort g DW <sup>-1</sup> |                                                                                                                                                                                                                      |
| DON effort             | $V_{DON}$  | 0.105   | effort g DW <sup>-1</sup> |                                                                                                                                                                                                                      |
| Water effort           | $V_{H2O}$  | 0.010   | effort g DW <sup>-1</sup> |                                                                                                                                                                                                                      |
| NO <sub>3</sub> effort | $V_{NO3}$  | 0.001   | effort g DW <sup>-1</sup> |                                                                                                                                                                                                                      |
| Nfix effort            | $V_{nfix}$ | 0.001   | effort g DW <sup>-1</sup> | Set to minimum effort                                                                                                                                                                                                |
| Soil water             | $W$        | 136.5   | mm                        | Spun up based on the representative year used for control calibration.                                                                                                                                               |
| Snow pack              | $W_{snow}$ | 64.6    | mm H <sub>2</sub> O       |                                                                                                                                                                                                                      |
| Soil Heat              | $SQ$       | 359.6   | arbitrary                 |                                                                                                                                                                                                                      |

| Steady State Fluxes                 | Symbol | Value | Notes                                            |
|-------------------------------------|--------|-------|--------------------------------------------------|
| <b>Carbon, g C/m<sup>2</sup>/yr</b> |        |       |                                                  |
| Photosynthesis                      | $U_c$  | 430   | =2 * Net Primary Production (Waring et al. 1998) |
| Plant maintenance respiration       | $R_a$  | 146.7 | $R_a = R_{cpt} - R_g - R_u$                      |
| Plant growth respiration            | $R_g$  | 53.75 | 0.25 * NPP                                       |



|                                               |            |        |                                                      |
|-----------------------------------------------|------------|--------|------------------------------------------------------|
| N uptake respiration                          | $R_u$      | 14.5   | Sum of N uptake * cost                               |
| DOC uptake                                    | $U_{DOM}$  | 8.95   | $U_{DON} * q_{DOM}$                                  |
| Total plant respiration                       | $R_{cpt}$  | 215    | $U_c$ - Net primary production                       |
| Net primary production                        | $NPP$      | 215    | Shaver & Chapin 1991 - Table 11                      |
| Coarse woody litter                           | $L_{CWC}$  | 49.45  | 23% of total litter (Shaver & Chapin 1991 - Fig. 5)  |
| Fine litter                                   | $L_C$      | 174.5  | Net primary production - $L_{CWC} + U_{dom}$         |
| D <sub>Cc</sub> to D <sub>C1</sub> transition | $T_{CWC}$  | 49.45  | Steady state for $W_C$                               |
| Phase I respiration                           | $R_{Cm1}$  | 168.3  | Steady state for $D_{C1}$                            |
| D <sub>C1</sub> to D <sub>C2</sub> transition | $T_{DC12}$ | 44.79  | $0.2 * L_C + L_{CWC}$ (Mellilo et al. 1989 - Fig. 1) |
| Phase II respiration                          | $R_{Cm2}$  | 44.79  | Steady state for $D_{C2}$                            |
| DOC production                                | $P_{DOM}$  | 13.97  | $P_{don} * q_{dom}$                                  |
| Microbial DOC uptake                          | $U_{DOMm}$ | 5      | Calibrated to $D_C$                                  |
| DOC inputs                                    | $I_{DOM}$  | 0      | Assumed equal to 0                                   |
| DOC leaching                                  | $L_{DOM}$  | 0.0243 | Steady state for $E_{dom}$                           |
| DOMR production                               | $P_{DOMR}$ | 1.91   | $P_{DOMR} * q_{DOMR}$                                |
| DOMR leaching                                 | $L_{DOMR}$ | 1.91   | Steady state for $E_{DOMR}$                          |
| DOMR deposition                               | $I_{DOMR}$ | 0      | Assumed equal to 0                                   |
| <b>Nitrogen, g N/m<sup>2</sup>/yr</b>         |            |        |                                                      |
| NH <sub>4</sub> deposition                    | $I_{NH4}$  | 0.0147 | Year 2000 data in Shaver and Laundre 2006a           |
| NO <sub>3</sub> deposition                    | $I_{NO3}$  | 0.0203 |                                                      |
| DON deposition                                | ----       | 0      | $I_{DOM}/q_{DOM}$                                    |

|                                  |              |         |                                                                |
|----------------------------------|--------------|---------|----------------------------------------------------------------|
| NH <sub>4</sub> leaching         | $L_{NH4}$    | 0.0013  | Yano 2010: Table 6 concentration* $R_O$                        |
| NO <sub>3</sub> leaching         | $L_{NO3}$    | 0.0003  | Steady state $E_{NO3}$                                         |
| DON leaching                     | $L_{DON}$    | 0.00657 | $L_{don} = L_{donT} - L_{donR}$                                |
| Nitrification                    | $T_{Ntr}$    | 0       | Negligible in control calibration                              |
| Denitrification                  | $T_{DNtr}$   | 0       | Negligible in control calibration                              |
| Plant NH <sub>4</sub> uptake     | $U_{NH4}$    | 2.96    | $U_{NTotal} - U_{DON} - U_{NO3} - U_{Nfix}$                    |
| Plant NO <sub>3</sub> uptake     | $U_{NO3}$    | 0       | NO <sub>3</sub> often below detection in tundra                |
| Plant DON uptake                 | $U_{DON}$    | 2.42    | Approximately 0.45 * $U_{NTotal}$ (Schimel & Chapin 1996)      |
| Plant N-fixation                 | $U_{nfix}$   | 0       | Negligible in control calibration                              |
| Coarse woody litter              | $L_{CWN}$    | 0.643   | $L_{CWC} * q_{WNwl} / q_C$                                     |
| Fine litter                      | $L_N$        | 4.73    | Steady state for $B_n$                                         |
| $D_{Nc}$ to $D_{Nl}$ transition  | $T_{CWN}$    | 0.643   | Steady state for $D_{Nc}$                                      |
| Microbial NH <sub>4</sub> uptake | $U_{NH4m}$   | 13      | $U_{NH4} * 4.4$ (Nadelhoffer et al. 1999 - Figure 1).          |
| Microbial NO <sub>3</sub> uptake | $U_{NO3m}$   | 0.02    | Assumes nearly all $I_{NO3}$ is taken up by microbes           |
| Microbial DON uptake             | $U_{DONm}$   | 1.351   | $U_{domm} / q_{DOM}$                                           |
| Nonsymbiotic N Fixation          | $U_{NNSFix}$ | 0.098   | Hobara et al. 2006 - Table 3                                   |
| Phase I N mineralization         | $R_{Nm1}$    | 13.87   | Steady state for $E_{NH4}$                                     |
| $D_{N1}$ to $D_{N2}$ transition  | $T_{DN12}$   | 2.084   | $T_{DC12} / (D_{C2} / D_{N2})$                                 |
| Phase II N mineralization        | $R_{Nm2}$    | 2.084   | Steady state for $D_{N2}$                                      |
| DON production                   | ----         | 3.777   | Steady state for $E_{dom}$                                     |
| Total N uptake                   | ----         | 5.375   | NPP C:N = 40 (Hobbie and Chapin 1998, Nadelhoffer et al. 2002) |
| DONR production                  | ----         | 0.1248  | Steady state $E_{domr}$                                        |

|                                               |             |        |                                                                                   |
|-----------------------------------------------|-------------|--------|-----------------------------------------------------------------------------------|
| DONR deposition                               | ----        | 0      | Assumed = 0                                                                       |
| DONR leaching                                 | ----        | 0.1248 | Assuming 95% DON loss is recalcitrant                                             |
| Total DON leaching                            | ----        | 0.1314 | Steady state: Total N budget                                                      |
|                                               |             |        |                                                                                   |
|                                               |             |        |                                                                                   |
| <b>Phosphorus, g P/m<sup>2</sup>/yr</b>       |             |        |                                                                                   |
| PO <sub>4</sub> deposition                    | $I_{PO_4}$  | 0.002  | Year 2000 data in Shaver and Laundre, 2006a                                       |
| PO <sub>4</sub> leaching                      | $L_{PO_4}$  | 0.0044 | Steady state: Total P budget.                                                     |
| <sup>o</sup> 1 mineral weathering             | $T_{PAw}$   | 0.0024 | Steady state for $P_a$                                                            |
| <sup>o</sup> 2 mineral weathering             | $T_{P2w}$   | 0.0012 | Assumed half of primary mineral weathering.                                       |
| <sup>o</sup> 2 mineral formation              | $T_{PO_4s}$ | 0.0012 | Steady state for $E_{PO_4}$                                                       |
| Plant PO <sub>4</sub> uptake                  | $U_{PO_4}$  | 0.5375 | NPP-P ~ 10% NPP-N (Shaver and Chapin 1991 - Table 10)                             |
| coarse woody litter                           | $L_{CWP}$   | 0.0643 | $L_{CWC} * q_{WPwl} / q_C$                                                        |
| fine litter                                   | $L_P$       | 0.4732 | Steady state for $B_p$                                                            |
| D <sub>Pc</sub> to D <sub>P1</sub> transition | $T_{CWP}$   | 0.0643 | Steady state for $D_{Pc}$                                                         |
| Microbial PO <sub>4</sub> uptake              | $U_{PO_4m}$ | 1.784  | Assume an approximate 7.3:1 N:P mass ratio for microbial uptake (Redfield, 1958). |
| Phase I P mineralization                      | $R_{Pm1}$   | 2.066  | Steady state for $D_{P1}$                                                         |
| D <sub>P1</sub> to D <sub>P2</sub> transition | $T_{DP12}$  | 0.2561 | $T_{DC12} / (DC2 : DP2)$                                                          |
| D <sub>P2</sub> mineralization                | $R_{Pm2}$   | 0.2561 | Steady state with $T_{DP2}$                                                       |
| <sup>o</sup> 1 mineral deposition             |             | 0.0024 | A constant rate to reflect exposure of new parent material.                       |
|                                               |             |        |                                                                                   |
| <b>Water, mm/yr</b>                           |             |        |                                                                                   |

|                             |           |       |                                                                                                                                                       |
|-----------------------------|-----------|-------|-------------------------------------------------------------------------------------------------------------------------------------------------------|
| Precipitation               | $I_{ppt}$ | 327.8 | Year 2000 daily temperature maximum, minimum pyranometer, and precipitation from Toolik Field Station's main weather station. Shaver and Laundre 2002 |
| Interception                | $I_{nt}$  | 32.78 | Estimated as $0.1 * I_{ppt}$                                                                                                                          |
| Runoff                      | $R_o$     | 118   | $I_{ppt} - I_{nt} - Transpiration$                                                                                                                    |
| Transpiration/ water uptake | $U_w$     | 144.2 | $I_{ppt} - R_o - I_{nt}$                                                                                                                              |
| Evapotranspiration          | -----     | 177   | Estimated as $0.54 * I_{ppt}$ (Kane 1997 - Table 3.1)                                                                                                 |

| Description                      | Symbol        | Value      | Units                                 | Notes                                                                                                                                                                                 |
|----------------------------------|---------------|------------|---------------------------------------|---------------------------------------------------------------------------------------------------------------------------------------------------------------------------------------|
| <b>Driving Variables:</b>        |               |            |                                       |                                                                                                                                                                                       |
| Daily minimum temperature        | $T_{min}$     | variable   | °C                                    | Year 2000 daily temperature maximum, minimum pyranometer, and precipitation from Toolik Field Station's main weather station. Shaver and Laundre 2002                                 |
| Daily maximum temperature        | $T_{max}$     | variable   | °C                                    |                                                                                                                                                                                       |
| Daily total short-wave radiation | $I$           | variable   | MJ m <sup>-2</sup> day <sup>-1</sup>  |                                                                                                                                                                                       |
| Precipitation                    | $I_{ppt}$     | variable   | mm day <sup>-1</sup>                  |                                                                                                                                                                                       |
| Depth of thaw                    | $z_T$         | variable   | m                                     | Shaver and Laundre 2006                                                                                                                                                               |
| Atmospheric CO <sub>2</sub>      | $C_a$         | 360        | mmol mol <sup>-1</sup>                | Assumed constant at 360 mmol mol <sup>-1</sup>                                                                                                                                        |
| NH <sub>4</sub> input            | $I_{NH4}$     | variable   | g N m <sup>-2</sup> day <sup>-1</sup> | Model runs on daily values. Annual totals are reported with model fluxes, daily values are calculated from precipitation and average nutrient concentration Shaver and Laundre 2006a) |
| NO <sub>3</sub> input            | $I_{NO3}$     | variable   | g N m <sup>-2</sup> day <sup>-1</sup> |                                                                                                                                                                                       |
| PO <sub>4</sub> input            | $I_{PO4}$     | variable   | g N m <sup>-2</sup> day <sup>-1</sup> |                                                                                                                                                                                       |
| DOM input                        | $I_{DOM}$     | variable   | g N m <sup>-2</sup> day <sup>-1</sup> |                                                                                                                                                                                       |
| DOMR input                       | $I_{DOMR}$    | variable   | g N m <sup>-2</sup> day <sup>-1</sup> |                                                                                                                                                                                       |
| Apatite input                    | $I_{apatite}$ | 0.00000664 | g P m <sup>-2</sup> day <sup>-1</sup> | A constant rate to reflect exposure of new parent material.                                                                                                                           |
| <b>Environment:</b>              |               |            |                                       |                                                                                                                                                                                       |
| Soil depth                       | $z$           | 0.35       | m                                     | Shaver and Laundre 2006b                                                                                                                                                              |

|                                    |                      |       |                                                       |                                                                                                                                                                                                                                                   |
|------------------------------------|----------------------|-------|-------------------------------------------------------|---------------------------------------------------------------------------------------------------------------------------------------------------------------------------------------------------------------------------------------------------|
| Soil porosity                      | $\rho_s$             | 0.85  | mm mm <sup>-1</sup>                                   | Bridgham et al. 2001                                                                                                                                                                                                                              |
| Bulk density                       | $D_{Bs}$             | 0.343 | Mg m <sup>-3</sup>                                    | Average value (Giblin et al. 1991, Nadelhoffer et al. 1995, Mack et al. 2004)                                                                                                                                                                     |
| NH <sub>4</sub> sorption capacity  | $S_{NH4}$            | 402   | g NH <sub>4</sub> -N Mg <sup>-1</sup> dry soil        | Fit to data in Mikolajkow 2003 - Fig. 3                                                                                                                                                                                                           |
| NH <sub>4</sub> affinity constant  | $\varepsilon_{NH4}$  | 786   | umol NH <sub>4</sub> L <sup>-1</sup>                  |                                                                                                                                                                                                                                                   |
| DOM sorption capacity              | $S_{DOM}$            | 805   | g DOM-C Mg <sup>-1</sup> dry soil                     | Fit to Vandenbruwane et al. 2007 - Fig. 1                                                                                                                                                                                                         |
| DOM affinity constant              | $\varepsilon_{DOM}$  | 2130  | umol DOM L <sup>-1</sup>                              |                                                                                                                                                                                                                                                   |
| PO <sub>4</sub> sorption capacity  | $S_{PO4}$            | 62    | g PO <sub>4</sub> -P Mg <sup>-1</sup> dry soil        | Fit to Vincent, 2006 - Fig. 2.2                                                                                                                                                                                                                   |
| PO <sub>4</sub> affinity constant  | $\varepsilon_{PO4}$  | 150   | umol PO <sub>4</sub> L <sup>-1</sup>                  |                                                                                                                                                                                                                                                   |
| DOMR sorption capacity             | $S_{DOMR}$           | 600   | g DOM-C Mg <sup>-1</sup> dry soil                     | Calculated from $E_{DOMR}$ and dissolved DOM concentration (Whittinghill 2010, Oosterwoud 2010)                                                                                                                                                   |
| DOMR affinity constant             | $\varepsilon_{DOMR}$ | 2130  | umol DOM L <sup>-1</sup>                              | Same as DOM                                                                                                                                                                                                                                       |
| field capacity                     | $\theta_f$           | 0.39  | mm mm <sup>-1</sup>                                   | Bridgham et al. 2001                                                                                                                                                                                                                              |
| Wilting point                      | $\theta_w$           | 0.15  | mm mm <sup>-1</sup>                                   | Assume range of 5-20% H <sub>2</sub> O by volume @wilting point. Organic soil at high end.                                                                                                                                                        |
| Field potential                    | $\psi_f$             | -0.01 | MPa                                                   | Dunne and Leopold 1978, p 176                                                                                                                                                                                                                     |
| Wilting potential                  | $\psi_w$             | -1.5  | MPa                                                   | Dunne and Leopold 1978, p 176                                                                                                                                                                                                                     |
| Initial SOM                        | $S_{OM0}$            | 18934 | g C m <sup>-2</sup>                                   | $D_C + S_C$                                                                                                                                                                                                                                       |
| initial DOP                        | $z_{po}$             | 0.35  | m                                                     | Shaver and Laundre 2006b                                                                                                                                                                                                                          |
| Radiation term                     | $b_I$                | 0.03  | heat m <sup>2</sup> day MJ <sup>-1</sup>              | Calibrated to observed soil temperatures                                                                                                                                                                                                          |
| Thermal conductivity to permafrost | $k_{pf}$             | 0.08  | MJ m <sup>-1</sup> day <sup>-1</sup> °C <sup>-1</sup> | Calibrated, but in the same relative proportion to the thermal conductivity values in Biesinger et al. 2007. We had to calibrate these values because we are simulating one soil layer rather than a continuous profile of small discrete layers. |

|                                   |            |          |                                                                  |                                                                                                                                                                                            |
|-----------------------------------|------------|----------|------------------------------------------------------------------|--------------------------------------------------------------------------------------------------------------------------------------------------------------------------------------------|
| Organic soil thermal conductivity | $k_{so}$   | 0.012    | $\text{MJ m}^{-1} \text{ day}^{-1} \text{ } ^\circ\text{C}^{-1}$ | Calibrated to observed soil temperatures                                                                                                                                                   |
| Mineral soil thermal conductivity | $k_{sm}$   | 0.024    | $\text{MJ m}^{-1} \text{ day}^{-1} \text{ } ^\circ\text{C}^{-1}$ | Calibrated to observed soil temperatures                                                                                                                                                   |
| Water thermal conductivity        | $k_w$      | 0.005    | $\text{MJ m}^{-1} \text{ day}^{-1} \text{ } ^\circ\text{C}^{-1}$ | Calibrated to observed soil temperatures                                                                                                                                                   |
| Snow thermal conductivity         | $k_{snow}$ | 0.0014   | $\text{MJ m}^{-1} \text{ day}^{-1} \text{ } ^\circ\text{C}^{-1}$ | Biesinger et al. 2007, assumes 10:1 snow:water volume                                                                                                                                      |
| Organic Soil Heat Capacity        | $c_{so}$   | 0.58     | $\text{MJ m}^{-3} \text{ } ^\circ\text{C}^{-1}$                  | Adapted from Biesinger et al. 2007. Relative values are proportional to each other, but smaller because they are applied to a single profile here rather than a series of discrete depths. |
| Mineral Soil Heat Capacity        | $c_{sm}$   | 3.28     | $\text{MJ m}^{-3} \text{ } ^\circ\text{C}^{-1}$                  |                                                                                                                                                                                            |
| Water Heat Capacity               | $c_w$      | 4.2      | $\text{MJ m}^{-3} \text{ } ^\circ\text{C}^{-1}$                  |                                                                                                                                                                                            |
| Zero low limit                    | $S_{QF}$   | 373.15   | $\text{MJ m}^{-3} \text{ } ^\circ\text{C}^{-1}$                  | Amount of heat contained in the soil when it warms to freezing, calibrated to soil temp data from Toolik                                                                                   |
| Zero high limit                   | $S_{QT}$   | 400      | $\text{MJ m}^{-3} \text{ } ^\circ\text{C}^{-1}$                  | Amount of heat contained in the soil as it cools to freezing                                                                                                                               |
| Permafrost temperature            | $T_{pf}$   | -7       | $^\circ\text{C}$                                                 | 1994-2003 average, Shaver and Laundre 2002                                                                                                                                                 |
| Snow albedo                       | $\alpha$   | 0.8      | ----                                                             | Biesinger et al. 2007                                                                                                                                                                      |
| Depth to permafrost               | $z_{pf}$   | 1.8      | m                                                                | This is assumed to be deep enough to serve as a constant temperature boundary for the soil temperature model.                                                                              |
| Depth to surface                  | $z_s$      | 0.2      | m                                                                | Representative depth for soil temperature                                                                                                                                                  |
| Organic soil index slope          | $a_p$      | 1.85E-05 | $\text{m}^3 \text{ g}^{-1} \text{ C}$                            | active layer depth/initial SOM at calibration site                                                                                                                                         |
| <b>Allometry:</b>                 |            |          |                                                                  |                                                                                                                                                                                            |
| C:dry weight ratio                | $q_C$      | 0.5      | $\text{g C g}^{-1} \text{ DW}$                                   | Shaver et al. 2006                                                                                                                                                                         |
| Ba intercept                      | $\alpha_B$ | 100      | $\text{g C m}^{-2}$                                              | Fit to Shaver and Chapin, 1991 and Chapin et al, 1995                                                                                                                                      |
| $B_A:B_T$ slope                   | $\gamma_B$ | 0.212676 | none                                                             |                                                                                                                                                                                            |
| Specific leaf area                | $a_{sla}$  | 0.006528 | $\text{m}^2 \text{ g}^{-1} \text{ DW}$                           | Shaver et al. 2001 - Table 5                                                                                                                                                               |
| Specific root length              | $a_{srl}$  | 27.5     | $\text{m g}^{-1} \text{ DW}$                                     | Average of estimates for <i>E. Vaginatatum</i> , deciduous, and evergreen plants (Bjork et al. 2007, Ostonen et al. 2007)                                                                  |

|                                                   |             |          |                                |                                                                                                         |
|---------------------------------------------------|-------------|----------|--------------------------------|---------------------------------------------------------------------------------------------------------|
| Leaf N fraction                                   | $q_{LN}$    | 0.0163   | g N g <sup>-1</sup> DW         | Shaver et al. 1989                                                                                      |
| Wood N fraction                                   | $q_{WN}$    | 0.00867  | g N g <sup>-1</sup> DW         |                                                                                                         |
| Root N fraction                                   | $q_{RN}$    | 0.0112   | g N g <sup>-1</sup> DW         |                                                                                                         |
| Leaf P fraction                                   | $q_{LP}$    | 0.00163  | g P g <sup>-1</sup> DW         | Calculated from biomass data (Shaver et al. 1989)/N:P<br>(Shaver & Chapin 1991 - Table 5 Tussock Site)  |
| Wood P fraction                                   | $q_{WP}$    | 0.000867 | g P g <sup>-1</sup> DW         |                                                                                                         |
| Root P fraction                                   | $q_{RP}$    | 0.00112  | g P g <sup>-1</sup> DW         |                                                                                                         |
| Stoichiometric feedback                           | $k_q$       | 0.3      | unitless                       | calibrated to response to changes in nutrient availability                                              |
| Leaf Area Index                                   | $LAI$       | 1.33     | m <sup>2</sup> m <sup>-2</sup> | $B_L * a_{sla}$                                                                                         |
| Active biomass (leaves and roots)                 | $B_a$       | 487.49   | g DW m <sup>-2</sup>           | Shaver et al. 2006                                                                                      |
| Leaf Biomass                                      | $B_L$       | 203.46   | g DW m <sup>-2</sup>           | Shaver et al. 2006                                                                                      |
| <b>Canopy Phenology:</b>                          |             |          |                                |                                                                                                         |
| Minimum canopy fraction                           | $f_{emin}$  | 0.4      | none                           | Shaver and Chapin 1991 - Figure 2                                                                       |
| Start Deg day sum                                 | $J_{DI}$    | 10       | Julian Day                     | Calibrated to phenology in Markon 2001, NDVI data for north slope                                       |
| Deg day bud open                                  | $D_{bud}$   | 10       | Degree day                     |                                                                                                         |
| Deg day full canopy                               | $D_{full}$  | 160      | Degree day                     |                                                                                                         |
| Day fall starts                                   | $J_{start}$ | 250      | Julian day                     |                                                                                                         |
| Day fall ends                                     | $J_{end}$   | 270      | Julian day                     |                                                                                                         |
| Time offset                                       | $T_{ly}$    | 0        | days                           | Simulation start relative to Jan 1                                                                      |
| Latitude                                          | $lat$       | 68.5     | degrees                        | Shaver and Laundre 2002                                                                                 |
| Jday divisor                                      | $J_{dayD}$  | 365      | days                           | Assuming a 365 day year                                                                                 |
| <b>Photosynthesis/Transpiration:</b>              |             |          |                                |                                                                                                         |
| Temperature response parameters for light capture | $T_{maxL}$  | 100      | °C                             | Values approximated from Johnson and Tieszen (1976, Figure 6), and Chapin and Shaver (1996, Figure 10), |

|                                                   |              |        |                                           |                                                                                                                                                                                                                                                                                                            |
|---------------------------------------------------|--------------|--------|-------------------------------------------|------------------------------------------------------------------------------------------------------------------------------------------------------------------------------------------------------------------------------------------------------------------------------------------------------------|
|                                                   | $T_{OL}$     | 25     | °C                                        | refined by calibrating to arctic LTER experimental plots (Chapin et al. 1995). Data were unavailable to use separate values for light capture and carboxylation. The approximate temperature range at Toolik (-46 to 27 oC, between 1994-2003) indicates that we will never use the high end of the curve. |
|                                                   | $a_L$        | 0.3    | °C <sup>-1</sup>                          |                                                                                                                                                                                                                                                                                                            |
| Ps light constant                                 | $g_I$        | 35.64  | g C m <sup>-2</sup> leaf hr <sup>-1</sup> | Calibrated to $U_I$                                                                                                                                                                                                                                                                                        |
| Light extinction                                  | $k_I$        | 0.5    | m <sup>2</sup> m <sup>-2</sup>            | Shaver et al. 2007                                                                                                                                                                                                                                                                                         |
| Light 1/2 saturation constant                     | $k_{PI}$     | 4      | MJ m <sup>-2</sup> day <sup>-1</sup>      | Calibrated to photosynthesis light curves (Shaver et al. 2007)                                                                                                                                                                                                                                             |
| Ps CO <sub>2</sub> rate constant                  | $g_C$        | 0.1095 | g C m <sup>-2</sup> leaf hr <sup>-1</sup> | Calibrated to $U_C$                                                                                                                                                                                                                                                                                        |
| CO <sub>2</sub> 1/2 saturation constant           | $k_C$        | 720    | ppm                                       | McMurtrie et al. 1992                                                                                                                                                                                                                                                                                      |
| Temperature response parameters for carboxylation | $T_{maxC}$   | 100    | °C                                        | Values approximated from Johnson and Tieszen (1976, Figure 6), and Chapin and Shaver (1996, Figure 10), refined by calibrating to arctic LTER experimental plots (Chapin et al. 1995)                                                                                                                      |
|                                                   | $T_{OC}$     | 25     | °C                                        |                                                                                                                                                                                                                                                                                                            |
|                                                   | $a_C$        | 0.3    | °C <sup>-1</sup>                          |                                                                                                                                                                                                                                                                                                            |
| Maximum leaf conductance                          | $c_{smax}$   | 20     | m hr <sup>-1</sup>                        | Williams et al. 1996 - Fig. 9                                                                                                                                                                                                                                                                              |
| H <sub>2</sub> O uptake constant                  | $g_W$        | 0.5443 | MPa <sup>-1</sup>                         | Calibrated to $U_W$                                                                                                                                                                                                                                                                                        |
| Water uptake factor                               | $k_E$        | 0.0001 | m <sup>2</sup> m <sup>-1</sup>            | Rastetter et al. 2013                                                                                                                                                                                                                                                                                      |
| Ca H <sub>2</sub> O weighting                     | $\beta$      | 0.01   | unitless                                  | Calibrated to match allocation of effort for CO <sub>2</sub> and H <sub>2</sub> O                                                                                                                                                                                                                          |
| scaler UCc                                        | $s_{Ucc}$    | 17.15  | unitless                                  | Calibrated to $U_C$                                                                                                                                                                                                                                                                                        |
| scaler ET                                         | $s_{cEt}$    | 25.91  | unitless                                  | Calibrated to water uptake and transpiration                                                                                                                                                                                                                                                               |
| <b>Plant Respiration:</b>                         |              |        |                                           |                                                                                                                                                                                                                                                                                                            |
| Respiration constant                              | $r_{mA}$     | 0.0369 | gC g <sup>-1</sup> N day <sup>-1</sup>    | Calibrated to NPP                                                                                                                                                                                                                                                                                          |
| NH <sub>4</sub> C cost                            | $\phi_{NH4}$ | 0.01   | g C g <sup>-1</sup> N                     | Assumed to be negligible relative to other forms of nitrogen                                                                                                                                                                                                                                               |



|                                               |               |           |                                            |                                                                              |
|-----------------------------------------------|---------------|-----------|--------------------------------------------|------------------------------------------------------------------------------|
| NO <sub>3</sub> C cost                        | $\phi_{NO_3}$ | 4.6       | g C g <sup>-1</sup> N                      | Gutschick 1981 (p 617) 1/4 to 1/2 N fixation cost                            |
| DON C cost                                    | $\phi_{DON}$  | 6         | g C g <sup>-1</sup> N                      | Not known, assuming value is between NO <sub>3</sub> and N-fixation C costs. |
| Nfix C cost                                   | $\phi_{Nfix}$ | 9.12      | g C g <sup>-1</sup> N                      | Gutschick 1981                                                               |
| Growth respiration                            | $r_g$         | 0.25      | fraction                                   | Waring and Schlesinger, 1985 - Table 2.3                                     |
| Woody respiration constant                    | $r_{mW}$      | 0.0369    | gC g <sup>-1</sup> N day <sup>-1</sup>     | Calibrated to NPP                                                            |
| Sapwood:hardwood partial exponent             | $k_{mW}$      | 1.61E-05  | m <sup>2</sup> g <sup>-1</sup> DW          | Assume no heartwood                                                          |
| Respiration Q10 slope                         | $m_{Q10R}$    | -0.0411   |                                            | Fit to data in Tjoelker 2001 - Table 2                                       |
| Respiration Q10 intercept                     | $b_{Q10R}$    | 3.202     | unitless                                   |                                                                              |
| <b>Plant nutrient uptake:</b>                 |               |           |                                            |                                                                              |
| Root radius                                   | $r_r$         | 0.0005    | m                                          | Fahey et al. 2005 - definition of fine root                                  |
| NH <sub>4</sub> uptake constant               | $g_{NH_4}$    | 8.843E-06 | g N m <sup>-1</sup> root day <sup>-1</sup> | Calibrated to $U_{NH_4}$                                                     |
| Plant NH <sub>4</sub> 1/2 saturation constant | $k_{NH_4}$    | 3.84      | umol L <sup>-1</sup>                       | Calibrated to arctic LTER experimental plots (Chapin et al. 1995)            |
| NO <sub>3</sub> uptake const                  | $g_{NO_3}$    | 0         | g N m <sup>-1</sup> root day <sup>-1</sup> | Calibrated to $U_{NO_3}$                                                     |
| Plant NO <sub>3</sub> 1/2 saturation constant | $k_{NO_3}$    | 3.84      | umol L <sup>-1</sup>                       | Calibrated to arctic LTER experimental plots (Chapin et al. 1995)            |
| PO <sub>4</sub> uptake constant               | $g_{PO_4}$    | 8.17E-07  | g P m <sup>-1</sup> root day <sup>-1</sup> | Calibrated to $U_{PO_4}$                                                     |
| Plant PO <sub>4</sub> 1/2 saturation constant | $k_{PO_4}$    | 1.6       | umol L <sup>-1</sup>                       | Calibrated to arctic LTER experimental plots (Chapin et al. 1995)            |
| DOM uptake constant                           | $g_{DOM}$     | 2.94E-05  | g C m <sup>-1</sup> root day <sup>-1</sup> | Calibrated to $U_{DOM}$                                                      |
| Plant DOM 1/2 saturation constant             | $k_{DOM}$     | 14.208    | umol L <sup>-1</sup>                       | = $q_{DOM} * k_{NH_4}$                                                       |
| Diffusion constant NH <sub>4</sub>            | $D_{NH_4}$    | 8.46E-05  | m <sup>2</sup> d <sup>-1</sup>             | Raynaud and Leadley 2004 - Table 3                                           |
| Diffusion constant NO <sub>3</sub>            | $D_{NO_3}$    | 4.03E-05  | m <sup>2</sup> d <sup>-1</sup>             | Raynaud and Leadley 2004 - Table 3                                           |

|                                        |            |           |                                          |                                                                                                                         |
|----------------------------------------|------------|-----------|------------------------------------------|-------------------------------------------------------------------------------------------------------------------------|
| Diffusion constant DON                 | $D_{DOM}$  | 8.46E-05  | $\text{m}^2 \text{d}^{-1}$               | Leadley et al. 1997 -Table 2: Diffusive supply of Glycine = NH4)                                                        |
| Diffusion constant PO <sub>4</sub>     | $D_{PO4}$  | 0.0000239 | $\text{m}^2 \text{d}^{-1}$               | Raynaud and Leadley 2004 - Table 3                                                                                      |
| Q <sub>10</sub> vegetation             | $Q_{10V}$  | 1.5       | unitless                                 | Calibrated to the warming response in Chapin et al 1995; Q10 for all plant uptake processes are assumed to be the same. |
| Nfix inhibition                        | $N_{fixI}$ | 2         | unitless                                 | N fixation turned off for these simulations                                                                             |
| N fixation rate constant               | $g_{Nfix}$ | 0         | $\text{g N m}^{-1} \text{root day}^{-1}$ |                                                                                                                         |
| <b>Litter losses:</b>                  |            |           |                                          |                                                                                                                         |
| Evergreen leaf turnover                | $m_{AL}$   | 0.001358  | $\text{day}^{-1}$                        | Calibrated to $L_C+L_{CWC}$                                                                                             |
| Wood turnover                          | $m_W$      | 0.0003446 | $\text{day}^{-1}$                        |                                                                                                                         |
| Root turnover                          | $m_{AR}$   | 0.0009921 | $\text{day}^{-1}$                        |                                                                                                                         |
| Leaf litter N fraction                 | $q_{LNI}$  | 0.008174  | $\text{g N g}^{-1} \text{DW}$            | Calibrated to $L_N+L_{CWN}$                                                                                             |
| Wood litter N fraction                 | $q_{WNI}$  | 0.009358  | $\text{g N g}^{-1} \text{DW}$            |                                                                                                                         |
| Root litter N fraction                 | $q_{RNI}$  | 0.02286   | $\text{g N g}^{-1} \text{DW}$            |                                                                                                                         |
| Leaf litter P fraction                 | $q_{LPI}$  | 0.0007489 | $\text{g P g}^{-1} \text{DW}$            | Calibrated to $L_P+L_{CWP}$                                                                                             |
| Wood litter P fraction                 | $q_{WPI}$  | 0.001104  | $\text{g P g}^{-1} \text{DW}$            |                                                                                                                         |
| Root litter P fraction                 | $q_{RPI}$  | 0.002211  | $\text{g P g}^{-1} \text{DW}$            |                                                                                                                         |
| Coarse woody turnover                  | $m_{CW}$   | 0.0002738 | $\text{day}^{-1}$                        | Calibrated to $L_{CWC}$                                                                                                 |
| Canopy closure woody litter parameters | $m_{CWx}$  | 0         | $\text{day}^{-1}$                        | Assuming no canopy closure                                                                                              |
|                                        | $k_{WL}$   | NA        | $\text{m}^{-2} \text{g}^{-1} \text{C}$   |                                                                                                                         |
| Coarse litter N fraction               | $q_{WNwl}$ | 6.5E-03   | $\text{g N g}^{-1} \text{DW}$            | $q_c D_{Nc}/D_{Cc}$                                                                                                     |
| Coarse litter P fraction               | $q_{WPwl}$ | 6.5E-04   | $\text{g P g}^{-1} \text{DW}$            | $q_c D_{Pc}/D_{Cc}$                                                                                                     |
|                                        |            |           |                                          |                                                                                                                         |

|                                        |                |           |                                       |                                                                                                                          |
|----------------------------------------|----------------|-----------|---------------------------------------|--------------------------------------------------------------------------------------------------------------------------|
| <b>Plant acclimation:</b>              |                |           |                                       |                                                                                                                          |
| Gain C                                 | $C_{gain}$     | 0.8470    | none                                  | Calibrated to steady state allocation of effort                                                                          |
| Gain N                                 | $N_{gain}$     | 0.7593    | none                                  |                                                                                                                          |
| Gain P                                 | $P_{gain}$     | 0.7551    | none                                  |                                                                                                                          |
| Requirement turnover                   | $\tau$         | 0.003     | day <sup>-1</sup>                     | assumed ~ 1 yr (Rastetter et al. 2013)                                                                                   |
| N-yield range                          | $\sigma_y$     | 0.15      | none                                  | Assumed yield must be within 15% before alternate N source used.                                                         |
| Acclimation rate                       | $a$            | 0.003     | day <sup>-1</sup>                     | assumed ~ 1 yr (Rastetter et al. 2013)                                                                                   |
| Minimum effort                         | $V_{min}$      | 0.001     | effort g <sup>-1</sup> DW             | This is set small enough to have little effect on effort budget but large enough for uptake to turn on in timely manner. |
| <b>Soil processes:</b>                 |                |           |                                       |                                                                                                                          |
| Microbial moisture response parameters | $\omega_b$     | 0.377     | pore fraction                         | Fit to McKane et al. 1997, Figure A1                                                                                     |
|                                        | $J_m$          | 1.95      | none                                  |                                                                                                                          |
|                                        | $\omega_{min}$ | 0.0431    | pore fraction                         |                                                                                                                          |
| Microbial Q <sub>10</sub>              | $Q_{10m}$      | 4         | none                                  | assumes Q <sub>10</sub> of ~4 (Davidson et al 1998)                                                                      |
| Coarse Woody turnover                  | $r_{CW}$       | 0.0003976 | day <sup>-1</sup>                     | Calibrated to $W_C$                                                                                                      |
| Microbial DOM uptake rate              | $\alpha_{DOM}$ | 5.995E-06 | day <sup>-1</sup>                     | Calibrated to $U_{DOMm}$                                                                                                 |
| Microbial DOM 1/2 saturation constant  | $k_{DOMm}$     | 37        | umol C L <sup>-1</sup>                | = $q_{DOM} * k_{NH4m}$                                                                                                   |
| C:N DOM                                | $q_{DOM}$      | 3.7       | g C g <sup>-1</sup> N                 | Average of C:N of all amino acids (Brooker et al. 2008)                                                                  |
| C:N DOMR                               | $q_{DOMR}$     | 15.32     | g C g <sup>-1</sup> N                 | Whittinghill 2010                                                                                                        |
| Microbial NH <sub>4</sub> uptake rate  | $\alpha_{NH4}$ | 2.703E-05 | g N m <sup>-2</sup> day <sup>-1</sup> | Calibrated to $U_{NH4m}$                                                                                                 |
| Maximum microbial C efficiency         | $\epsilon_C$   | 0.6       | none                                  | Hunt et al. 1991 - Table 2                                                                                               |
| Microbe return C:N                     | $\phi_N$       | 21.5      | g C g <sup>-1</sup> N                 | Calculated from steady state $S_C/S_N$                                                                                   |

|                                                   |                 |             |                                                      |                                                                                                                           |
|---------------------------------------------------|-----------------|-------------|------------------------------------------------------|---------------------------------------------------------------------------------------------------------------------------|
| Phase II soil C:N                                 | $\phi_{NII}$    | 21.5        | g C g <sup>-1</sup> N                                | Calculated from steady state $S_C/S_N$                                                                                    |
| Microbial NH <sub>4</sub> 1/2 saturation constant | $k_{NH4m}$      | 10          | umol N L <sup>-1</sup>                               | Raynaud et al. 2006 - Table 2. Assumes soil water at field capacity.                                                      |
| Microbial NO <sub>3</sub> uptake rate             | $\alpha_{NO3}$  | 1.616E-07   | g N m <sup>-2</sup> day <sup>-1</sup>                | Calibrated to $U_{NO3m}$                                                                                                  |
| Microbial NO <sub>3</sub> 1/2 saturation constant | $k_{NO3m}$      | 80          | umol N L <sup>-1</sup>                               | Raynaud et al. 2006 - Table 2. Assumes soil water at field capacity                                                       |
| Microbial PO <sub>4</sub> uptake rate             | $\alpha_{PO4}$  | 5.746E-06   | g P m <sup>-2</sup> day <sup>-1</sup>                | Calibrated to $U_{PO4m}$                                                                                                  |
| Microbial PO <sub>4</sub> 1/2 saturation constant | $k_{PO4m}$      | 4.15        | umol P L <sup>-1</sup>                               | Assumes same ratio of NH <sub>4</sub> <sup>+</sup> :PO <sub>4</sub> <sup>3-</sup> half-saturation constants as for plants |
| Microbe return C:P                                | $\phi_P$        | 174.9       | g C g <sup>-1</sup> P                                | Calculated from steady state $S_C/S_P$                                                                                    |
| Phase II soil C:P                                 | $\phi_{PII}$    | 174.9       | g C g <sup>-1</sup> P                                | Calculated from steady state $S_C/S_P$                                                                                    |
| C mineralization constant                         | $\psi_m$        | 0.00020548  | day <sup>-1</sup>                                    | Calibrated to $R_m$                                                                                                       |
| N mineralization constant                         | $\psi_{Nm}$     | 7.813E-05   | day <sup>-1</sup>                                    | Calibrated to $R_{Nm}$                                                                                                    |
| P mineralization constant                         | $\psi_{Pm}$     | 0.000179624 | day <sup>-1</sup>                                    | Calibrated to $R_{Pm}$                                                                                                    |
| DOM production rate                               | $r_{DOM}$       | 6.515E-08   | m <sup>2</sup> g <sup>-1</sup> N                     | Calibrated to $P_{DOM}$                                                                                                   |
| DOMR production rate                              | $r_{DOMR}$      | 8.92E-09    | m <sup>2</sup> g <sup>-1</sup> N                     | Calibrated to $P_{DOMR}$                                                                                                  |
| Phase I to phase II transition rate               | $\xi_{I2}$      | 3.711E-05   | day <sup>-1</sup>                                    | Calibrated to $T_{DC12}$                                                                                                  |
| Phase II mineralize rate                          | $\rho_{m2}$     | 1.345E-05   | day <sup>-1</sup>                                    | Calibrated to $R_{Cm2}$                                                                                                   |
| Nitrification rate                                | $r_{Nitr}$      | 0           | g N m <sup>-2</sup>                                  | Calibrated to $T_{Ntr}$                                                                                                   |
| Nitrification 1/2 saturation constant             | $k_{Nitr}$      | 8           | umol N L <sup>-1</sup>                               | Raynaud et al. 2006 - Table 2. Assumes soil water at field capacity.                                                      |
| Denitrification rate                              | $r_{DNtr}$      | 0           | g N m <sup>-2</sup> day <sup>-1</sup>                | Calibrated to $T_{DNtr}$                                                                                                  |
| Denitrification 1/2 saturation constant           | $k_{DNtr}$      | 80          | umol NO <sub>3</sub> L <sup>-1</sup>                 | Tian et al. 2010 - Table 5. Assumes soil water at field capacity.                                                         |
| Denitrification minimum soil moisture             | $\theta_0$      | 0.39        | fraction soil volume                                 | assumed = field capacity                                                                                                  |
| Soil Nfix rate constant                           | $\gamma_{Sfix}$ | 4.484E-09   | g <sup>2</sup> N g <sup>-2</sup> C day <sup>-1</sup> | Calibrated to $U_{NNSFix}$                                                                                                |

|                                        |               |           |                                       |                                                                                |
|----------------------------------------|---------------|-----------|---------------------------------------|--------------------------------------------------------------------------------|
| Soil Nfix critical C:N                 | $q_{Sfix}$    | 21.5      | g C g N <sup>-1</sup>                 | Assume that N-fixation stops if C:N of Ph I soil drops below C:N of ph II soil |
| <b>Soil P transformations:</b>         |               |           |                                       |                                                                                |
| °1 mineral weathering rate             | $r_{PAw}$     | 2.644E-07 | day <sup>-1</sup>                     | Calibrated to $P_A$                                                            |
| °2 mineral formation rate              | $r_{PO4s}$    | 0.0000225 | day <sup>-1</sup>                     | Calibrated to $T_{PO4s}$                                                       |
| °2 mineral weathering rate             | $r_{P2w}$     | 2.351E-07 | day <sup>-1</sup>                     | Calibrated to $P_{no}$                                                         |
| <b>Hydrology and material loss:</b>    |               |           |                                       |                                                                                |
| soil drain rate                        | $D_w$         | 1         | day <sup>-1</sup>                     | sandy loam, Heath 1983                                                         |
| Loss fraction NH <sub>4</sub>          | $\eta_{NH4}$  | 0.0946    | none                                  | Calibrated to $L_{NH4}$                                                        |
| Loss fraction NO <sub>3</sub>          | $\eta_{NO3}$  | 0.1345    | none                                  | Calibrated to $L_{NO3}$                                                        |
| Loss fraction PO <sub>4</sub>          | $\eta_{PO4}$  | 1.280     | none                                  | Calibrated to $L_{PO4}$                                                        |
| Loss fraction DOM                      | $\eta_{DOM}$  | 0.2673    | none                                  | Calibrated to $L_{DOM}$                                                        |
| Loss fraction DOMR                     | $\eta_{DOMR}$ | 1.188     | none                                  | Calibrated to $L_{DOMR}$                                                       |
| Interception volume                    | $v_{int}$     | 0.394     | mm m <sup>-2</sup>                    | Calibrated to $I_{nt}$                                                         |
| Non-leaf surface area                  | $\beta_{int}$ | 0         | m <sup>2</sup> m <sup>-2</sup>        | Assumes all interception is on leaves                                          |
| Branch exponent                        | $\eta_{br}$   | 0.4       | none                                  |                                                                                |
| Mid-wood biomass                       | $B_{MW}$      | 100       | g DW m <sup>-2</sup>                  | Not used; interception on stems turned off                                     |
| Snowfall critical temp                 | $T_{crt}$     | 0.76      | °C                                    | Brubaker et al. 1996                                                           |
| Snowmelt critical temp                 | $T_{crt_s}$   | 2         | °C                                    | Calibrated to timing of snow melt                                              |
| Latent heat of fusion H <sub>2</sub> O | $C_{NR}$      | 0.334     | MJ L <sup>-1</sup>                    | Physical constant                                                              |
| Short wave absorption                  | $C_{SW}$      | 0.1       | none                                  | Dunne and Leopold 1978 - Fig. 13.5                                             |
| Long wave absorption                   | $C_{LW}$      | 18        | none                                  | Calibrated to observed snowmelt                                                |
| Convective coefficient                 | $C_C$         | 2         | mm °C <sup>-1</sup> day <sup>-1</sup> | Brubaker et al. 1996                                                           |



## References

- Biesinger, Z., E. B. Rastetter, and B. L. Kwiatkowski. 2007. Hourly and daily models of active layer evolution in arctic soils *Ecological Modelling* 206:131-146.  
doi:10.1016/j.ecolmodel.2007.03.030.
- Björk, R. G., H. Majdi, L. Klemetsson, L. Lewis-Jonsson, and U. Molau. 2007. Long-term warming effects on root morphology, root mass distribution, and microbial activity in two dry tundra plant communities in northern Sweden *New Phytologist* 176:862-873.  
doi:10.1111/j.1469-8137.2007.02231.x.
- Bridgham, S. D., C. L. Ping, J. L. Richardson, and K. Updegraff. 2001. Soils of northern peatlands: histosols and gelsols. *In* Richardson, J. L., and M. J. Vepraskas, editors. *Wetland soils; their genesis, hydrology, landscape and separation into hydric and nondydric soils*, Ann Arbor Press, .
- Brubaker, K., A. Rango, and W. Kustas. 1996. Incorporating radiation inputs into the snowmelt runoff model. *Hydrological Processes* 10:1329-1343.
- Chapin, F. S., III, R. J. Barsdate, and D. Barèl. 1978. Phosphorus cycling in Alaskan coastal tundra: A hypothesis for the regulation of nutrient cycling. *Oikos* 31:189-199.
- Chapin, F. S., III, G. R. Shaver, A. E. Giblin, K. J. Nadelhoffer, and J. A. Laundre. 1995. Responses of Arctic tundra to experimental and observed changes in climate. *Ecology* 76:694-711.
- Davidson, E. A., E. Belk, and R. D. Boone. 1998. Soil water content and temperature as independent or confounded factors controlling soil respiration in a temperate mixed hardwood forest *Global Change Biology* 4:217-227. doi:10.1046/j.1365-2486.1998.00128.x.
- Dennis, J. G. 1977. Distribution patterns of belowground standing crop in Arctic tundra at Barrow, Alaska. *Arctic and Alpine Research* 9:113-127.
- Dunne, T., and L. B. Leopold. 1978. *Water in Environmental Planning*. W.H. Freeman and Company, New York, NY.
- Fahey, T. J., T. G. Siccama, C. T. Driscoll, G. E. Likens, J. Campbell, C. E. Johnson, J. J. Battles, J. D. Aber, J. J. Cole, M. C. Fisk, P. M. Groffman, S. P. Hamburg, R. T. Holmes, P. A. Schwarz, and R. D. Yanai. 2005. The biogeochemistry of carbon at Hubbard Brook. *Biogeochemistry* 75:109-176.
- Giblin, A. E., K. J. Nadelhoffer, G. R. Shaver, J. A. Laundre, and A. J. McKerrow. 1991. Biogeochemical diversity along a riverside toposequence in Arctic Alaska. *Ecological Monographs* 61:415-435.
- Gough, L., D. Johnson, B. Moon, J. Knight, A. Treuer, C. Moulton, and C. Jordan. 2009. Above ground plant and below ground stem biomass in the Arctic LTER moist acidic tussock tundra experimental plots, 2006, Toolik Lake, Alaska. :  
doi:10.6073/pasta/d0bb465790568a81e32f1343852b9531.
- Gutschick, V. P. 1981. Evolved strategies in nitrogen acquisition by plants. *The American Naturalist* 118:607-637.
- Heath, R. 1983. *Basic ground-water hydrology*. US Geological Survey Water-supply paper 2220. United States Government Printing Office, Alexandria, VA.
- Hobara, S., C. McCalley, K. Koba, A. E. Giblin, M. S. Weiss, G. M. Gettel, and G. R. Shaver. 2006. Nitrogen fixation in surface soils and vegetation in an Arctic tundra watershed: A key source of atmospheric nitrogen. *Arctic, Antarctic, and Alpine Research* 38:363-372.
- Hobbie, S. E., and L. Gough. 2002. Foliar and soil nutrients in tundra on glacial landscapes of contrasting ages in northern Alaska. *Oecologia* 131:453-462.

- Hobbie, S. E., and F. S. Chapin III. 1998. The response of tundra plant biomass, aboveground production, nitrogen, and CO<sub>2</sub> flux to experimental warming. *Ecology* 79:1526-1544.
- Hunt, H. W., M. J. Trlica, E. F. Redente, J. C. Moore, J. K. Detling, T. G. F. Kittel, D. E. Walter, M. C. Fowler, D. A. Klein, and E. T. Elliott. 1991. Simulation model for the effects of climate change on temperate grassland ecosystems *Ecological Modelling* 53:205-246. doi:10.1016/0304-3800(91)90157-V.
- Johnson, D. A., and L. L. Tieszen. 1976. Aboveground biomass allocation, leaf growth, and photosynthesis patterns in tundra plant forms in Arctic Alaska. *Oecologia* 24:159-173.
- Kane, D. 1997. The impact of hydrologic perturbations on Arctic ecosystems induced by climate change. Pages 63-81 *In* Oechel, W. C., T. Callaghan, T. Gilmanov, J. I. Holten, B. Maxwell, U. Molau, and B. Sveinbjornsson, editors. *Global Change and Arctic Terrestrial Ecosystems*, Springer, New York, NY.
- Kirkby, C. A., J. A. Kirkegaard, A. E. Richardson, L. J. Wade, C. Blanchard, and G. Batten. 2011. Stable soil organic matter: A comparison of C:N:P:S ratios in Australian and other world soils. *Geoderma* 161:197-208.
- Leadley, P. W., J. F. Reynolds, and F. S. Chapin III. 1997. A model of nitrogen uptake by *Eriophorum vaginatum* roots in the field: ecological implications. *Ecological Monographs* 67:1-22.
- Mack, M. C., E. A. Schuur, M. S. Bret-Harte, G. R. Shaver, and F. S. Chapin. 2004. Ecosystem carbon storage in arctic tundra reduced by long-term nutrient fertilization *Nature* 431:440-443. doi:10.1038/nature02887 [doi].
- McDowell, W. H., A. Zsolnay, J. A. Aitkenhead-Peterson, E. G. Gregorich, D. L. Jones, D. Jödemann, K. Kalbitz, B. Marschner, and D. Schwesig. 2006. A comparison of methods to determine the biodegradable dissolved organic carbon from different terrestrial sources. *Soil Biology and Biochemistry* 38:1933-1942.
- McKane, R. B., E. B. Rastetter, G. R. Shaver, K. J. Nadelhoffer, A. E. Giblin, J. A. Laundre, and F. S. Chapin. 1997. Climatic effects on tundra carbon storage inferred from experimental data and a model. *Ecology* 78:1170-1187.
- McMurtrie, R. E., H. N. Comins, M. U. F. Kirschbaum, and Y. Wang. 1992. Modifying Existing Forest Growth Models to take account of effects of Elevated CO<sub>2</sub>. *Australian Journal of Botany* 40:657-677. doi:10.1071/BT9920657.
- Melillo, J. M., J. D. Aber, A. E. Linkins, A. Ricca, B. Fry, and K. J. Nadelhoffer. 1989. Carbon and nitrogen dynamics along the decay continuum: Plant litter to soil organic matter. Pages 53-62 *In* Clarholm, M., and L. Bergström, editors. *Ecology of Arable Land - Perspectives and Challenges*, Springer Netherlands, .
- Mikolajkow, J. 2003. Laboratory methods of estimating the retardation factor of migrating mineral nitrogen compounds in sallow groundwater. *Geological Quarterly* 47:91-96.
- Nadelhoffer, K., G. R. Shaver, and A. E. Giblin. 1995. Carbon, nitrogen, and phosphorus content in the seasonally thawed soils are described for four arctic tundra vegetation types located near the Toolik Field Station, Arctic LTER 1993. : doi:doi:10.6073/pasta/aef8cdbace6b521e480bcc6f2ddb9546.
- Nadelhoffer, K. J., B. A. Emmett, P. Gundersen, O. J. Kjønaas, C. J. Koopmans, P. Schleppi, A. Tietema, and R. F. Wright. 1999. Nitrogen deposition makes a minor contribution to carbon sequestration in temperate forests. *Nature* 398:145-148. doi:10.1038/18205.
- Oosterwoud, M. R., E. J. M. Temminghoff, and S. E. A. T. M. van der Zee. 2010. Quantification of DOC concentrations in relation with soil properties of soils in tundra and taiga of



- Northern European Russia Biogeosciences Discussions 7:3189 <last\_page> 3226.  
doi:10.5194/bgd-7-3189-2010.
- Ostonen, I., Ü. Püttsepp, C. Biel, O. Alberton, M. R. Bakker, K. Lõhmus, H. Majdi, D. Metcalfe, A. F. M. Olsthoorn, A. Pronk, E. Vanguelova, M. Weih, and I. Brunner. 2007. Specific root length as an indicator of environmental change *Plant Biosystems - An International Journal Dealing with all Aspects of Plant Biology* 141:426-442. doi:10.1080/11263500701626069.
- Rastetter, E. B., P. M. Vitousek, C. Field, G. R. Shaver, D. Herbert, and G. I. Ågren. 2001. Resource optimization and symbiotic nitrogen fixation. *Ecosystems* 4:369-388.
- Rastetter, E. B., R. D. Yanai, R. Q. Thomas, M. A. Vadeboncoeur, T. J. Fahey, M. C. Fisk, B. L. Kwiatkowski, and S. P. Hamburg. 2013. Recovery from disturbance requires resynchronization of ecosystem nutrient cycles *Ecological Applications* 23:621-642. doi:10.1890/12-0751.1.
- Raynaud, X., J. Lata, and P. W. Leadley. 2006. Soil microbial loop and nutrient uptake by plants: a test using a coupled C:N model of plant-microbial interactions. *Plant and Soil* 287:95-116. doi:10.1007/s11104-006-9003-9.
- Raynaud, X., and P. W. Leadley. 2004. Soil characteristics play a key role in modeling nutrient competition in plant communities. *Ecology* 85:2200-2214.
- Redfield, A. C. 1958. The biological control of chemical factors in the environment. *American Scientist* 46:205-221.
- Schimel, J. P., and F. S. Chapin III. 1996. Tundra plant uptake of amino acid and NH<sub>4</sub><sup>+</sup> nitrogen in situ: Plants compete well for amino acid N. *Ecology* 77:2142-2147.
- Shaver, G. R., and J. A. Laundre. 2006a. Bulk precipitation collected during summer months on a per rain event basis at Toolik Field Station, North Slope of Alaska, Arctic LTER 1988 to 2007. : doi:10.6073/pasta/cb6e3030fb69d2bf9549d8fe529a67fd.
- Shaver, G. R., and J. A. Laundre. 2006b. Late season thaw depth measured in the ARC LTER moist acidic tussock experimental plots at Toolik Field Station, AK Arctic LTER 1993 to current year. : doi:10.6073/pasta/e7c2be020f700c6452554f56e23bcdb4.
- Shaver, G. R., and J. A. Laundre. 2002. Daily weather data file for Arctic Tundra LTER site at Toolik Lake, Arctic LTER 2000. : doi:10.6073/pasta/66b4074425afab3f20eb2817f0e79966.
- Shaver, G. R., L. E. Street, E. B. Rastetter, M. T. VanWijk, and M. Williams. 2007. Functional convergence in regulation of net CO<sub>2</sub> flux in heterogeneous tundra landscapes in Alaska and Sweden. *Journal of Ecology* 95:802-817.
- Shaver, G. R., F. S. Chapin III, J. A. Laundre, M. S. Bret-Harte, and M. C. Mack. 2006. Year 2000 data in Above ground plant biomass in a mesic acidic tussock tundra experimental site from 1982 to 2000 Arctic LTER, Toolik Lake, Alaska. : doi:10.6073/pasta/5cc889e7055d3d4e55cc243025986018.
- Shaver, G. R., and Chapin III F. Stuart. 1991. Production: Biomass relationships and element cycling in contrasting Arctic vegetation types. *Ecological Monographs* 61:1-31.
- Shaver, G. R., M. S. Bret-Harte, M. H. Jones, J. Johnstone, L. Gough, J. A. Laundre, and F. S. Chapin III. 2001. Species Composition interacts with fertilizer to control long-term change in tundra productivity. *Ecology* 82:3163-3181.
- Sullivan, P. F., M. Sommerkorn, H. M. Rueth, K. J. Nadelhoffer, G. R. Shaver, and J. M. Welker. 2007. Climate and species affect fine root production with long-term fertilization in acidic tussock tundra near Toolik Lake, Alaska. *Oecologia* 153:643-652.
- Tian, H., X. Xu, M. Liu, W. Ren, C. Zhang, G. Chen, and C. Lu. 2010. Spatial and temporal patterns of CH<sub>4</sub> and N<sub>2</sub>O fluxes in terrestrial ecosystems of North America during 1979–

- 2008: application of a global biogeochemistry model. *Biogeosciences* 7:2673-2694.  
doi:10.5194/bg-7-2673-2010.
- Tjoelker, M. G., J. Oleksyn, and P. B. Reich. 2001. Modelling respiration of vegetation: evidence for a general temperature-dependent Q<sub>10</sub>. *Global Change Biology* 7:223 <last\_page> 230.  
doi:10.1046/j.1365-2486.2001.00397.x.
- Vandenbruwane, J., S. De Neve, R. G. Qualls, S. Sleutel, and G. Hofman. 2007. Comparison of different isotherm models for dissolved organic carbon (DOC) and nitrogen (DON) sorption to mineral soil *Geoderma* 139:144-153. doi:10.1016/j.geoderma.2007.01.012.
- Vincent, A. A. 2006. Evaluation of phosphorus transport and transformations in GLEAMS 3.0. .:
- Waring, R. H., and W. H. Schlesinger. 1985. *Forest ecosystems; concepts and management*. Academic Press, Orlando, FL.
- Waring, R. H., J. J. Landsberg, and M. Williams. 1998. Net primary production of forests: a constant fraction of gross primary production? *Tree physiology* 18:129-134.  
doi:10.1093/treephys/18.2.129.
- Whittinghill, K. A. 2010. Effect of topography and glaciation history on the movement of carbon and nitrogen within arctic hillsides. .:
- Williams, M., E. B. Rastetter, D. N. Fernandes, M. L. Goulden, S. C. Wofsy, G. R. Shaver, J. M. Melillo, J. W. Munger, S. M. Fan, and K. J. Nadelhoffer. 1996. Modelling the soil-plant-atmosphere continuum in a *Quercus-Acer* stand at Harvard Forest: the regulation of stomatal conductance by light, nitrogen, and soil/plant hydraulic properties. *Plant, Cell and Environment* 18:911-927. doi:10.1111/j.1365-3040.1996.tb00456.x.
- Yanai, R. D. 1992. Phosphorus budget of a 70-year-old northern hardwood forest. *Biogeochemistry* 17:1-22.
- Yano, Y., G. R. Shaver, A. E. Giblin, E. B. Rastetter, and K. J. Nadelhoffer. 2010. Nitrogen dynamics in a small arctic watershed: retention and downhill movement of <sup>15</sup>N. *Ecological Monographs* 80:331-351.
